# Supplementary material for: Beyond monetary benefits of restoring sight in Vietnam: Evaluating well-being gains from cataract surgery
Source: PLoS One. 2018 Feb 12;13(2):e0192774. doi: 10.1371/journal.pone.0192774 (PMC5809077; doi:10.1371/journal.pone.0192774)
Supplement: S4 File — Anonymized caregiver data for use in MS Excel. (XLS) [file pone.0192774.s004.xls]

## Sheet: Sheet1
group(PatientName)	wave	Carer Name	A2. Your age	A3. Gender 0=Male 1=Female	A7. Your dependent�s gender? 0=Male 1=Female	A8. Do you live with your dependent? 1=Yes 0=No	A9. Are you currently working? 1=Yes 0=No	A11. Is your dependent currently working? 1=Yes 0=No	A14. What is your current monthly income?	B1. How many people reside in the household?	C1. Are you currently in school? 1=Yes 0=No	C8. What level of education have you reached?	D1. In general, how would you rate your overall health now? 0=Excellent 1=very g	D2. In general, how would you rate your overall mental health now? 0=Excellent 1	nervous	calm	downhearted	happy	emotional_wellbeing
61	1	Ph�ng Th? Tu	59	Female	Male	Yes	No	No	0	3	No	2	poor	poor	60	20	40	20	35
14	1	�? Th? Bu?i	54	Female	Male	Yes	No	Yes	0	6	No	4	poor	fair	80	20	80	20	50
46	1	Huynh Thi Ranh	42	Female	Male	Yes	Yes	No	3500000	6	No	1	poor	poor	20	20	20	40	25
5	1	Hu?nh Th? Ng?c Y?n	20	Female	Female	No	Yes	No	2500000	4	Yes		good	good	40	20	60	40	40
11	1	�? Th? Tr�c Ly	44	Female	Female	Yes	Yes	Yes	3700000	6	No	5	fair	fair	20	20	40	20	25
20	1	Nguy?n ��nh Ph�c	53	Male	Male	Yes	No	Yes	5500000	4	No	16	fair	poor	0	0	40	20	15
77	1	Truong S? Th?nh	43	Male	Male	Yes	Yes	No	5000000	9	No	14	fair	fair	60	40	60	20	45
18	1	Truong Van Tr?n	55	Male	Male	No	No	No	0	6	No	12	good	good	60	80	60	80	70
13	1	Nguy?n Th? Hoa	48	Female	Male	Yes	Yes	Yes	3000000	4	No	9	fair	fair	20	20	60	20	30
37	1	Phan Van Thi?n	46	Male	Male	No	Yes	No	3000000	1	No	7	poor	fair	40	0	60	20	30
54	1	Tran Thi Nam	63	Female	Male	Yes	No	Yes	0	7	No	5	fair	fair	40	20	60	20	35
9	1	L� Th? M?ng Ho�i	43	Female	Male	Yes	Yes	Yes	4000000	6	No	10	good	good	60	80	80	80	75
28	1	Nguy?n Th? Kim H?ng	53	Female	Female	Yes	Yes	Yes	3000000	3	No	9	good	fair	40	20	40	20	30
81	1	Vo Thanh Thao	32	Female	Male	Yes	Yes	No	5000000	2	No	15	good	fair	40	20	40	20	30
57	1	Ph?m Th? Thu V�n	55	Female	Male	Yes	Yes	No	3000000	11	No	5	fair	poor	60	80	80	40	65
67	1	Nguy?n M? Dung	59	Female	Female	Yes	No	No	0	7	No	16	fair	poor	0	0	60	40	25
7	1	Quay Ngoc Sang	66	Male	Female	Yes	Yes	Yes	1000000	13	No	5	good	good	80	40	60	40	55
39	1	Nguy?n Th? H?ng Hu?	22	Female	Male	No	Yes	No	4500000	5	No	12	fair	very good	100	80	100	80	90
58	1	L� Nhu Th?o	36	Male	Male	Yes	Yes	No	5000000	4	No	12	good	fair	0	0	80	20	25
24	1	�inh Van Kh�ng	69	Male	Female	Yes	Yes	Yes	2000000	4	No	12	fair	very good	80	40	60	40	55
29	1	V� Th�nh Vinh	39	Male	Female	Yes	Yes	Yes	1500000	7	No	4	fair	fair	60	40	60	20	45
76	1	Nguy?n Thanh Y?n Tr�m	19	Female	Female	Yes	Yes	Yes	6000000	9	No	9	fair	poor	0	0	40	20	15
32	1	Truong Ho�ng Minh	55	Male	Female	Yes	Yes	No	2000000	8	No	2	fair	fair	60	40	60	40	50
27	1	Nguy?n Th�nh �?t	55	Male	Male	Yes	Yes	No	6000000	7	No	9	good	fair	20	20	80	20	35
75	1	Tr?n Ch� Trung	24	Male	Male	Yes	Yes	Yes	2500000	4	No	11	fair	fair	80	40	40	40	50
47	1	Nguy?n Ng?c H?i	38	Male	Male	No	Yes	No	6000000	2	No	12	Excellent	very good	80	80	80	80	80
51	1	Mai Cam Hong	26	Female	Female	Yes	Yes	No	5000000	3	No	7	fair	fair	20	20	40	20	25
79	1	Tr?n Th? Xu�n Sen	52	Female	Female	No	Yes	No	2500000	3	No	12	fair	fair	60	20	60	20	40
44	1	Nguy?n Th? Tu	62	Female	Male	Yes	Yes	No	0	5	No	3	fair	fair	60	40	40	20	40
71	1	Tr?n Th? Ng?c Y?n	55	Female	Female	Yes	Yes	No	8000000	5	No	16	fair	poor	20	20	20	20	20
23	1	Huynh Nguyet Nga	55	Female	Male	Yes	Yes	Yes	0	3	No	5	fair	poor	60	60	40	20	45
50	1	L� Th? ?m	44	Female	Male	Yes	Yes	No	5000000	2	No	4	good	good	100	80	100	80	90
40	1	�? Th? Ngoc �nh	58	Female	Male	Yes	Yes	No	1500000	6	No	10	fair	fair	80	40	80	40	60
3	1	Nguy?n Van T�n	34	Male	Female	Yes	Yes	Yes	4000000	3	No	9	good	good	60	80	80	0	55
60	1	Nguyen Thi Kim Lien	60	Female	Male	Yes	No	Yes	0	5	No	9	fair	fair	40	20	40	20	30
69	1	Nguy?n Van L�nh	53	Male	Female	Yes	Yes	Yes	6000000	2	No	6	poor	fair	40	40	60	20	40
33	1	V� Qu� Phong	36	Male	Female	Yes	Yes	No	4000000	2	No	10	fair	fair	60	20	60	20	40
41	1	Nguyen Minh Tam	31	Male	Male	Yes	Yes	Yes	2500000	5	No	7	very good	good	80	40	80	40	60
22	1	Nguyen Thi Van	53	Female	Male	Yes	Yes	No	6000000	7	No	8	fair	poor	40	40	80	40	50
1	1	Cao Xu�n Qu?ng	62	Male	Female	Yes	No	No	0	10	No	12	very good	very good	100	100	100	100	100
82	1	Hu?nh Th? Thanh H�	29	Female	Female	Yes	Yes	No	5000000	3	No	7	good	fair	60	80	100	20	65
45	1	Nguy?n Van Ph�c	40	Male	Male	No	Yes	Yes	4000000	4	No	9	very good	very good	80	20	80	40	55
8	1	H? Van Thi?n	31	Male	Male	No	Yes	No	4000000	2	No	7	good	good	60	40	60	40	50
52	1	L? Ti?u Hoan	20	Female	Female	Yes	Yes	No	5500000	3	No	12	very good	good	80	80	100	60	80
42	1	L�m Th? Ung	56	Female	Male	Yes	Yes	No	2000000	2	No	2	fair	fair	20	0	60	0	20
74	1	Nguy?n Th? Thanh	48	Female	Male	Yes	Yes	Yes	2000000	2	No	14	poor	poor	20	20	20	20	20
62	1	Tang Cu?ng	47	Male	Female	Yes	Yes	No	3000000	6	No	6	good	good	60	40	60	0	40
68	1	Tr?n Th�nh Lu�n	29	Male	Male	Yes	Yes	Yes	6000000	8	No	11	fair	fair	100	80	100	80	90
65	1	V� Th? L�ng	53	Female	Male	Yes	Yes	Yes	10000000	6	No	2	fair	fair	60	40	80	20	50
53	1	Tr?n Th? C?m Duy�n	29	Female	Female	Yes	Yes	Yes	5000000	4	No	7	good	fair	20	20	80	40	40
63	1	H? Ng?c B?o L?c	37	Male	Female	No	Yes	No	15000000	7	No	16	Excellent	very good	80	60	80	60	70
43	1	Nguyen Thi Ghi	45	Female	Male	Yes	Yes	No	1000000	5	No	3	fair	poor	20	20	20	20	20
35	1	Phan Van L?ch	19	Male	Female	Yes	Yes	No	3000000	5	No	9	very good	good	80	40	80	40	60
66	1	Nguyen Thi Gam	61	Female	Male	Yes	Yes	No	1000000	2	No	12	poor	fair	20	20	20	20	20
25	1	Nguy?n T?n Th�nh	56	Male	Female	Yes	Yes	No	6000000	2	No	12	poor	fair	0	0	20	20	10
34	1	Tr?n Van Luom	61	Male	Female	Yes	No	No	1800000	3	No	5	fair	very good	0	40	100	60	50
55	1	Nguy?n Th? Thanh Th�y	51	Female	Male	Yes	Yes	Yes	6000000	2	No	4	poor	fair	40	20	40	20	30
78	1	Truong Th? C?m V�n	43	Female	Female	No	Yes	Yes	3000000	2	No	4	good	good	60	40	60	40	50
64	1	Nguy?n Th? L?c	50	Female	Male	Yes	Yes	Yes	0	8	No	5	good	very good	80	80	100	80	85
80	1	Nguy?n V�n Thanh	26	Male	Female	Yes	Yes	Yes	15000000	2	Yes		good	very good	60	40	80	40	55
4	1	Nguyen Thi Nga	49	Female	Male	Yes	Yes	No	2000000	3	No	8	fair	fair	60	20	60	20	40
17	1	Tr?n Nh?t Tru?ng	35	Male	Female	Yes	Yes	Yes	10000000	6	No	13	good	fair	20	20	20	20	20
83	1	Tran Van Linh	25	Male	Female	Yes	Yes	Yes	5000000	2	No	10	Excellent	good	80	60	80	20	60
10	1	Luu Minh Phuong	34	Male	Female	Yes	Yes	No	5000000	9	No	7	good	fair	60	40	80	20	50
31	1	Hu?nh Van B?c	32	Male	Female	No	Yes	Yes	12000000	4	No	16	very good	very good	100	100	100	100	100
16	1	Nguy?n �?c T�m	55	Male	Female	Yes	Yes	Yes	2000000	3	No	7	good	very good	80	80	80	40	70
26	1	H? Van Chuong	28	Male	Female	No	Yes	Yes	12000000	2	No	16	good	good	60	80	80	80	75
59	1	Phan Th? �t Gi�u	24	Female	Male	Yes	Yes	Yes	5000000	6	No	9	Excellent	fair	60	60	60	40	55
36	1	Nguy?n Th? B�ch Tr�m	10	Female	Female	Yes	No	No	0	4	Yes		poor	good	40	20	60	20	35
19	1	Duong Th? B�ch Dung	50	Female	Male	Yes	Yes	Yes	0	2	No	10	fair	good	60	80	80	80	75
12	1	Tr?n Th? Vinh	26	Male	Female	Yes	Yes	No	6000000	3	No	10	good	fair	60	40	100	40	60
56	1	L� Th? G�i	51	Female	Male	Yes	Yes	No	2000000	3	No	9	poor	poor	0	0	0	20	5
38	1	Nguy?n C?m T�	24	Female	Male	No	Yes	Yes	7000000	4	No	15	good	good	40	20	80	20	40
2	1	Hu?nh Th? �nh Tuy?t	53	Female	Female	Yes	Yes	Yes	3000000	3	No	7	fair	fair	60	20	60	20	40
72	1	Tran Thi My Hanh	41	Female	Female	Yes	Yes	Yes	3000000	4	No	14	fair	fair	20	20	20	0	15
21	1	L� B?ch Y?n	66	Female	Male	Yes	No	No	0	6	No	5	fair	fair	0	20	60	20	25
48	1	Tran Thi Huong	50	Female	Male	Yes	Yes	Yes	4000000	5	No	5	fair	fair	60	20	40	20	35
49	1	L� Thanh Son	57	Male	Female	Yes	Yes	Yes	13500000	3	No	12	very good	good	80	60	80	40	65
73	1	H� Van sang	48	Male	Male	No	Yes	Yes	3500000	3	No	4	fair	fair	60	40	80	40	55
6	1	Duong Minh Lu�n	32	Male	Male	Yes	Yes	No	0	6	No		fair	fair	100	40	100	0	60
15	1	Nguy?n Thanh Phu?c H?u	32	Male	Female	Yes	Yes	No	7500000	2	No	10	good	good	60	80	80	0	55
30	1	B�i Th? Chi	28	Female	Female	No	No	No	0	8	No	6	good	fair	20	40	80	40	45
70	1	Luu Vinh	56	Male	Female	Yes	Yes	Yes	1500000	9	No	9	fair	fair	20	20	60	20	30
61	2	Ph�ng Th? Tu	59	Female	Male	Yes	No	No	0	3	No	2	poor	fair	60	40	60	40	50
78	2	Truong Thi Cam Van	44	Female	Female	Yes	Yes	Yes	3000000	2	No	4	good	good	100	60	100	60	80
79	2	Tr?n Th? Xu�n Sen	52	Female	Female	No	Yes	No	2000000	3	No	12	very good	very good	80	100	100	80	90
56	2	Le Thi Gai	52	Female	Male	Yes	Yes	No	2000000	3	No	9	good	good	80	80	100	40	75
21	2	Le Bach Yen	61	Female	Male	Yes	Yes	No	2000000	6	No	5	good	very good	80	60	80	60	70
27	2	Nguy?n Th�nh �?t	55	Male	Female	Yes	Yes	No	7000000	7	No	9	Excellent	Excellent	100	100	100	100	100
48	2	Tran Thi Huong	50	Female	Male	Yes	Yes	Yes	4000000	5	No	5	fair	fair	60	40	40	20	40
57	2	Ph?m Th? Thu V�n	55	Female	Male	Yes	Yes	No	3000000	3	No	5	fair	fair	60	80	80	20	60
8	2	Ho Van Thien	31	Male	Male	No	Yes	No	5000000	2	No	7	fair	good	40	20	60	40	40
80	2	Nguy?n V�n Thanh	26	Male	Female	Yes	Yes	Yes	17000000	2	No	16	good	very good	80	80	80	80	80
51	2	Mai Cam Hong	27	Female	Female	Yes	Yes	No	5000000	3	No	7	good	good	80	80	80	80	80
64	2	Nguy?n Th? L?c	50	Female	Male	Yes	No	Yes	0	8	No	5	good	Excellent	100	100	100	80	95
37	2	Phan Van Thi?n	46	Male	Female	No	Yes	No	3000000	1	No	7	very good	very good	100	100	100	80	95
1	2	Cao Xu�n Qu?ng	62	Male	Female	Yes	No	No	0	10	No	12	very good	Excellent	100	100	100	100	100
17	2	Tran Nhat Truong	36	Male	Female	Yes	Yes	Yes	10000000	6	No	13	very good	very good	80	80	80	40	70
58	2	L� Nhu Th?o	36	Female	Male	Yes	Yes	Yes	7000000	4	No	12	very good	very good	100	100	80	0	70
34	2	Tran Van Luom	62	Male	Female	Yes	No	Yes	0	3	No	5	good	good	80	60	100	80	80
70	2	Luu Vinh	56	Male	Female	Yes	Yes	Yes	2000000	9	No	9	very good	Excellent	100	100	100	80	95
59	2	Phan Thi Ut Giau	25	Female	Male	Yes	Yes	No	5000000	6	No	9	good	good	100	100	100	100	100
16	2	Nguyen Duc Tam	55	Male	Female	Yes	Yes	Yes	2000000	3	No	7	good	very good	80	80	80	80	80
54	2	Tran Thi Nam	64	Female	Male	Yes	No	Yes	0	7	No	3	good	good	80	80	100	80	85
66	2	Nguyen Thi Gam	61	Female	Male	Yes	Yes	Yes	1000000	2	No	12	poor	fair	40	20	20	20	25
36	2	Nguy?n Th? B�ch Tr�m	10	Female	Female	Yes	No	Yes	0	4	Yes		fair	very good	80	80	80	80	80
10	2	Luu Minh Phuong	35	Male	Female	Yes	Yes	No	5000000	9	No	7	good	fair	80	20	80	20	50
20	2	Nguy?n ��nh Ph�c	63	Male	Male	Yes	No	Yes	5500000	4	No	16	very good	Excellent	100	100	100	100	100
49	2	Ly Thanh Son	57	Male	Female	Yes	Yes	No	13500000	3	No	12	very good	fair	60	40	60	40	50
50	2	L� Th? ?m	54	Female	Male	Yes	Yes	Yes	3000000	2	No	4	good	very good	100	80	100	80	90
38	2	Nguyen Cam Tu	25	Female	Male	Yes	Yes	Yes	7000000	3	No	15	good	good	80	60	80	60	70
2	2	Hu?nh Th? �nh Tuy?t	53	Female	Male	Yes	Yes	Yes	3000000	3	No	7	Excellent	Excellent	100	100	100	100	100
45	2	Nguyen Van Phuc	40	Male	Male	No	Yes	Yes	4000000	4	No	9	very good	very good	80	20	80	40	55
39	2	Nguy?n Th? H?ng Hu?	22	Female	Male	No	Yes	Yes	4500000	6	No	12	fair	Excellent	100	100	100	100	100
40	2	Do Thi Ngoc Anh	48	Female	Male	Yes	Yes	No	1500000	6	No	10	good	good	80	60	100	80	80
60	2	Nguyen Thi Kim Lien	61	Female	Male	Yes	No	Yes	0	5	No	8	good	very good	80	80	100	60	80
28	2	Nguyen Thi Kim Hang	54	Female	Female	Yes	Yes	No	3000000	3	No	9	good	good	80	60	60	20	55
72	2	Tran Thi My Hanh	41	Female	Female	Yes	Yes	Yes	3000000	4	No	14	fair	fair	60	20	60	20	40
52	2	L? Ti?u Hoan	20	Female	Female	Yes	Yes	Yes	8000000	3	No	12	very good	very good	100	100	100	100	100
25	2	Nguy?n T?n Th�nh	56	Male	Female	Yes	No	No	6000000	2	No	12	very good	very good	100	100	100	80	95
23	2	Huynh Nguyet Nga	56	Female	Male	Yes	No	Yes	0	3	No	5	good	good	80	80	80	80	80
33	2	V� Qu� Phong	36	Male	Female	Yes	Yes	No	5000000	2	No	10	Excellent	very good	100	100	100	80	95
9	2	L� Th? M?ng Ho�i	43	Female	Male	Yes	Yes	Yes	4000000	6	No	10	very good	good	60	40	80	40	55
76	2	Nguy?n Thanh Y?n Tr�m	20	Female	Male	Yes	Yes	Yes	7000000	9	No	9	Excellent	Excellent	100	100	100	100	100
81	2	Vo Thanh Thao	33	Female	Male	Yes	Yes	No	5000000	2	No	15	good	good	80	60	80	80	75
29	2	V� Th�nh Vinh	38	Male	Female	Yes	Yes	Yes	2000000	7	No	4	Excellent	Excellent	100	100	100	100	100
77	2	Truong S? Th?nh	43	Male	Male	Yes	Yes	Yes	8000000	9	No	14	Excellent	Excellent	100	100	100	100	100
53	2	Tr?n Th? C?m Duy�n	29	Female	Female	Yes	Yes	Yes	7000000	4	No	7	Excellent	Excellent	100	100	100	100	100
69	2	Nguy?n Van L�nh	53	Male	Female	Yes	Yes	Yes	7000000	2	No	6	very good	Excellent	100	100	100	80	95
73	2	H� Van Sang	50	Male	Female	No	Yes	Yes	4000000	3	No	4	very good	Excellent	100	100	100	80	95
83	2	Tran Van Linh	25	Male	Female	Yes	Yes	Yes	5000000	2	No	10	Excellent	very good	80	40	80	40	60
47	2	Nguyen Ngoc Hai	38	Male	Male	No	Yes	No	6000000	2	No	12	Excellent	Excellent	80	80	80	80	80
11	2	�? Th? Tr�c Ly	44	Female	Female	Yes	Yes	Yes	4000000	6	No	5	very good	very good	100	100	100	80	95
31	2	Hu?nh Van B?c	32	Male	Female	No	Yes	Yes	12000000	4	No	16	Excellent	Excellent	100	100	100	100	100
41	2	Nguyen Minh Tam	31	Male	Male	Yes	Yes	Yes	3000000	5	No	7	very good	very good	80	20	80	60	60
15	2	Nguy?n Thanh Phu?c H?u	32	Male	Female	Yes	Yes	No	7500000	2	No	10	good	very good	100	80	100	80	90
30	2	B�i Th? Chi	28	Female	Female	No	Yes	Yes	2000000	8	No	6	Excellent	very good	100	100	100	100	100
32	2	Truong Hoang Minh	56	Male	Female	Yes	Yes	No	2000000	8	No	2	fair	very good	80	80	80	80	80
43	2	Nguyen Thi Ghi	45	Female	Male	Yes	Yes	Yes	1000000	5	No	3	good	fair	40	20	80	20	40
35	2	Phan Van Lich	19	Male	Female	Yes	Yes	No	3000000	5	No	9	very good	good	80	40	80	40	60
62	2	Tang Cu?ng	47	Male	Female	Yes	Yes	No	2500000	6	No	6	good	good	60	40	60	0	40
13	2	Nguyen Thi Hoa	49	Female	Male	Yes	Yes	Yes	3000000	4	No	9	good	good	80	60	100	60	75
4	2	Nguyen Thi Nga	49	Female	Male	Yes	Yes	No	2000000	3	No	8	good	good	60	40	80	20	50
65	2	V� Th? L�ng	54	Female	Male	Yes	Yes	Yes	10000000	6	No	2	very good	very good	100	100	100	80	95
7	2	Quay Ngoc Sang	66	Male	Female	Yes	Yes	Yes	2000000	13	No	5	poor	good	80	40	80	40	60
19	2	Duong Th? B�ch Dung	50	Female	Male	Yes	No	Yes	0	2	No	10	fair	very good	100	80	100	80	90
68	2	Tr?n Th�nh Lu�n	29	Male	Male	Yes	Yes	Yes	6000000	9	No	11	good	Excellent	80	80	100	80	85
42	2	L�m Th? Ung	56	Female	Male	Yes	Yes	No	2000000	2	No	2	fair	good	40	20	60	20	35
55	2	Nguy?n Th? Thanh Th�y	51	Female	Male	Yes	Yes	Yes	3000000	2	No	4	Excellent	Excellent	100	100	100	100	100
14	2	Do Thi Buoi	55	Female	Male	Yes	No	Yes	0	6	No	4	good	good	80	60	100	60	75
12	2	Tr?n Th? Vinh	26	Male	Female	Yes	Yes	No	6000000	3	No	10	Excellent	Excellent	100	100	100	100	100
5	2	Huynh Thi Ngoc Yen	20	Female	Female	No	Yes	No	3000000	4	Yes		good	very good	60	20	60	40	45
26	2	H? Van Chuong	27	Male	Female	No	Yes	Yes	12000000	2	No	16	good	good	100	80	100	80	90
18	2	Truong Van Tr?n	55	Male	Male	No	No	No	0	6	No	12	good	very good	100	100	100	100	100
75	2	Tr?n Tr� Trung	24	Male	Male	Yes	Yes	No	5000000	4	No	11	Excellent	Excellent	100	100	100	80	95
24	2	Dinh Van Khang	69	Male	Female	Yes	No	No	0	4	No	12	fair	good	60	40	60	40	50
71	2	Tr?n Th? Ng?c Y?n	61	Female	Female	No	Yes	No	8000000	5	No	16	very good	very good	100	100	100	100	100
46	2	Huynh Thi Ranh	43	Female	Male	Yes	Yes	Yes	1500000	6	No	1	fair	fair	60	40	60	40	50
63	2	Ho Ngoc Bao Loc	37	Male	Female	No	Yes	No	15000000	7	No	16	Excellent	Excellent	80	60	80	80	75
6	2	Duong Minh Lu�n	32	Male	Male	Yes	Yes	Yes	0	6	No	16	fair	good	100	60	100	20	70
82	2	Hu?nh Th? Thanh H�	39	Female	Female	Yes	Yes	Yes	5000000	3	No	7	Excellent	Excellent	100	100	100	100	100
44	2	Nguy?n Th? Tu	62	Female	Male	Yes	No	No	0	5	No	3	very good	Excellent	100	100	100	100	100
67	2	Nguy?n M? Dung	59	Female	Female	Yes	No	No	4000000	7	No	16	fair	fair	40	20	80	20	40
74	2	Nguyen Thi Thanh	48	Female	Male	Yes	Yes	Yes	2000000	2	No	14	fair	fair	20	20	20	20	20
22	2	Nguyen Thi Van	54	Female	Male	Yes	Yes	No	6000000	7	No	8	good	good	80	80	80	80	80
3	2	Nguyen Van Tan	34	Male	Female	Yes	Yes	Yes	4000000	3	No	9	very good	good	60	80	80	0	55
